1                                    **A simple egg marking method for polygynous fishes**

2

3

4    Tessa K. Solomon-Lane<sup>1</sup> & Matthew S. Grober<sup>2,3</sup>

5

6

7    KEY WORDS: egg, dye, mark, external fertilization, fish, food coloring, *Lythrypnus*

8    *dalli*, reproductive success

9

10

11

12

13

14

15

16

17

18

19

20    <sup>1</sup>Department of Integrative Biology, 1 University Station #C0930, University of Texas at

21                    Austin, Austin, TX 78712; E-mail: [tksolomonlane@utexas.edu](mailto:tksolomonlane@utexas.edu).

22    <sup>2</sup>Department of Biology, <sup>3</sup>Neuroscience Institute, 50 Decatur Ave, Georgia State

23                    University, Atlanta, GA 30302

24 **ABSTRACT**

25 Fitness is the ultimate measure of organismal function; however, technical challenges can  
26 limit researchers' ability to quantify fitness. We developed a simple and inexpensive  
27 method of marking eggs inside of the ovary of a nesting fish, the bluebanded goby  
28 (*Lythrypnus dalli*), in order to quantify female reproductive success. Multiple females in  
29 a harem of *L. dalli* can lay eggs inside of the male's nest within a short period of time,  
30 making the timing of egg laying or developmental stage of the eggs insufficient to  
31 identify which female laid which clutch of eggs. After injecting small volumes of food  
32 coloring into the ovaries, each female's eggs can be identified throughout development  
33 by the color of the yolk. We make preliminary observations about the efficacy of  
34 different colors (red, yellow, green, blue) for use in *L. dalli*, including effects on female  
35 survival, social behavior, and the enzyme immunoassays used to quantify hormones.  
36 While rigorous validations should be conducted for each species and experimental  
37 context, this method of marking eggs has the potential to be broadly useful for directly  
38 estimating fitness in species with external fertilization, as well as research in reproductive  
39 biology, development, behavioral ecology, and evolution.

## 40 INTRODUCTION

41 Quantifying fitness is fundamentally important to testing the adaptive function of  
42 traits in the study of evolution and its underlying mechanisms. Reproductive success is  
43 one of the best approximations of fitness (reviewed in Pradhan et al., 2015), and it is  
44 feasible to quantify the number of offspring produced by an individual in a diversity of  
45 species in the field (e.g., Buston, 2004; Griffith et al., 2008; Silk et al., 2009) and in the  
46 laboratory/artificial habitats (e.g., O'Rourke and Mendelson, 2014; Sih et al., 2014;  
47 White et al., 2010). Here, we report on a simple and inexpensive method of marking fish  
48 eggs with food coloring in order to quantify reproductive success for multiple females  
49 simultaneously in a harem of bluebanded gobies (*Lythrypnus dalli*). This highly social,  
50 sex changing fish is a useful study species because females lay large numbers of demersal  
51 eggs frequently (Solomon-Lane et al., 2015), males readily parent (Pradhan et al., 2014),  
52 and the hatched larvae can be reared in the laboratory (Archambeault et al., 2016).  
53 Quantifying male reproductive success has already provided important insight into social  
54 behavior and social network structure as targets for natural selection (Solomon-Lane et  
55 al., 2015).

56 Across species, parentage cannot be assumed on the basis of which nest offspring  
57 develop in or the identity of the individuals providing parental care. For example, extra  
58 pair copulations in birds (Griffith et al., 2008) and pirate (e.g., Tatarenkov et al., 2006)  
59 and sneaker males (e.g., Svensson and Kvarnemo, 2007) in fish can result in parents  
60 caring for unrelated offspring. For gobies, one of the largest families of advanced fishes,  
61 multiple females can lay eggs in the same nest within short succession (Tamada, 2008).  
62 Visual assessment of developmental stage or the timing of egg laying are not sufficient to

63 identify which female contributed which clutch of eggs (Takahashi and Ohara, 2006).  
64 Our goal was to develop a method of marking eggs in order to rapidly and visually  
65 identify the mother while having minimal/no impact on female health, social behavior, or  
66 reproductive behavior and biology. Previous studies have used intraperitoneal injections  
67 of various dyes, the most effective of which for gobies was brilliant blue FCF (Okuda et  
68 al., 2002). We expand on this work by testing multiple colors of dye that are  
69 commercially available as food coloring. Food coloring is inexpensive, multiple colors  
70 can be delivered in the same vehicle (see Okuda et al., 2002), and, to our knowledge, the  
71 dyes do not independently impact reproductive success (e.g.,  $\beta$ -carotene, Okuda et al.,  
72 2002; Olson and Owens, 1998).

73 We used two small injections of dye, one into each ovary, to mark eggs (Fig 1a,  
74 b). The dye incorporates into the egg yolk and persists through embryonic development  
75 (Fig 1c). This manipulation was used as a part of a study investigating connections  
76 among social behavior, reproduction, and hormones, and we share preliminary  
77 observations about effects on *L. dalli* health, social interactions, egg laying, and the  
78 enzyme immunoassays used to quantify hormones. Beyond this proof of principle, direct  
79 validations of this method for other contexts and/or other species should be conducted to  
80 identify and assess possible side effects or unintended consequences. This simple method  
81 of dying eggs can be broadly useful for estimating female fitness in species with external  
82 fertilization.

83

## 84 **MATERIALS AND METHODS**

### 85 *Social group formation and dye injection*

86 We collected *L. dalli* (23.5-47.6 mm standard length) from reefs offshore of  
87 Catalina Island, California during the reproductive season (California Fish and Game  
88 permit SC-11879) using hand nets while SCUBA diving. The fish were housed at the  
89 Wrigley Institute for Environmental Studies (Catalina Island, University of Southern  
90 California). One day after collection, we formed social groups of 4 fish: 1 large,  
91 dominant male and 3 females of varying sizes (n=65). Behavior and reproduction were  
92 analyzed in social groups with no mortality (n=51). To form groups with fish of specific  
93 sizes and sex ratios, fish were briefly anesthetized in tricaine methanesulfonate (MS-222;  
94 500 mg/L salt water). To dye the eggs, we injected a small volume (~0.03-0.05 mL) of  
95 undiluted blue, yellow, or green food coloring (Dec-A-Cake icing tint) into each ovary  
96 using a 28.5-gauge insulin syringe (BD Lo-Dose) (Fig 1a). Each female in a group was  
97 dyed a different color, and color was balanced across statuses. We did not include a no-  
98 dye control injection group in this study (see discussion). Our pilot experiments suggest  
99 that the stage of egg development in the ovary can impact the effectiveness of the dye.  
100 For *L. dalli*, mid-cycle injections were the most effective. Females injected immediately  
101 after laying often had clutches that were incompletely or only faintly dyed, similar to  
102 intraperitoneal (rather than ovarian) injections.

103

#### 104 ***Quantifying reproduction and behavior***

105 Males were provided with a PVC nest tube (3 inch length, 1 inch diameter) lined  
106 with acetate, on which females lay demersal eggs. We performed egg checks from the  
107 outside of the tank every 30 minutes from 6 am to 8 pm, and if present, we removed the  
108 acetate, took a digital picture, and returned the eggs within minutes (as in Solomon-Lane

109 et al., 2014). We used ImageJ (Schneider et al., 2012) to count the number of eggs laid.

110 Dye could affect social behavior through physiological mechanisms or because it  
111 temporarily (~24 hours) colors the entire fish, internally and externally (Fig. 1c). We  
112 conducted 4 10-minute behavioral observations in the first ~52 hours after social groups  
113 were formed, including 1 min, 3 hours, ~24 hours, and ~52 hours after the fish were  
114 introduced into their group. We recorded social interactions among all members of the  
115 group, including approaches, when one fish swims directly towards another fish within 2  
116 body lengths, and displacements, a response to an approach in which the approached fish  
117 swims away. Displacements are a measure of aggression, and being displaced is a signal  
118 of submission by subordinates (Rodgers et al., 2007). Behaviors summed over the 4  
119 observation periods are presented as behaviors per min. We tested for effects of dye color  
120 on the behaviors expressed by the dyed fish (approaches, displacements), as well as how  
121 group members interacted with that fish (approaches to the focal female, submissions  
122 by/displacements of the focal female). Because the effects could be status-specific  
123 (Solomon-Lane et al., 2014), we also included social status in our analyses.

124

### 125 *Enzyme immunoassays*

126 Collecting water-borne hormones is a non-invasive method of quantifying  
127 systemic steroid hormones (Kidd et al., 2010). Water collected from injected fish can  
128 contain visible quantities of dye; therefore, it was critical to determine whether dye  
129 affected the enzyme immunoassays (Cayman Chemical). To test the effect of the green,  
130 yellow, and blue dyes on the cortisol, 11-ketotestosterone (a potent fish androgen), and  
131  $17\beta$ -estradiol enzyme immunoassays, we completed two standard curves per assay. We

132 added 1 $\mu$ l of dye to each well of one standard curve (e.g., cortisol: yellow in standards 2-  
133 3; blue in standards 4-5; and green in standards 6-8). 1 $\mu$ l of ultrapure water was added to  
134 wells of the control curve. The assay was then completed according to the supplied  
135 instructions, and the plates were read 105 min following development for cortisol and 11-  
136 ketotestosterone and after 135 min for 17 $\beta$ -estradiol. We present the equation and r-  
137 squared value for the dyed and control standard curves.

138

### 139 *Data analysis*

140 Statistical analyses were conducted using R Studio (version 1.0.143). Results  
141 were considered significant at the  $p < 0.05$  level. The box of the box and whisker plots  
142 show the median and the first and third quartiles. The whiskers extend to the largest and  
143 smallest observations within or equal to 1.5 times the interquartile range. We used mixed  
144 factorial ANOVAs to identify differences in behavior (approaches, displacements,  
145 approaches to females, submissions) among females injected with different dye colors  
146 (between-subjects factor), differences among females of different statuses (within-  
147 subjects factor), or status-by-color interactions. Tukey's HSD tests were used for *post hoc*  
148 analysis of significant results. Chi-squared tests were used to analyze differences across  
149 dye colors in mortality and egg laying. A Mann-Whitney U test was used to compare the  
150 number of eggs laid by yellow- and green-injected females. Clutches of blue eggs were  
151 excluded due to insufficient sample size ( $n=3$ ). Statistical comparisons of the slopes of  
152 dyed and control standard curves were compared by hand as in Fischer et al., 2014 (Zar,  
153 1999).

154

155 **RESULTS**

156 *Dye colors and mortality*

157 Red, yellow, blue, and green dyes are included in standard food coloring  
158 packages. Red dye (no. 40) was not used because the fish did not survive the pilot  
159 injections. We formed 65 social groups of 1 male and 3 females of different social  
160 statuses (alpha, beta, gamma). Each female in the group was injected with a different dye  
161 color (yellow, green, or blue), and dye color was balanced across social statuses.  
162 Mortality was very low overall (179 of 195 females survived; 8.2% mortality), and there  
163 were no differences in survival across dye color ( $\chi^2=0.54$ ,  $n=195$ ,  $d.f.=2$ ,  $p=0.76$ ).

164

165 *Dye color does not affect social behavior*

166 There were no differences in rates of approaching among dye colors ( $F_{2,144}=2.15$ ,  
167  $p=0.12$ ), but there was a trend for differences in rates of approaching across social  
168 statuses ( $F_{2,144}=2.96$ ,  $p=0.055$ ). There was no interaction effect ( $F_{4,144}=0.62$ ,  $p=0.65$ ). For  
169 displacements, there were no differences among dye colors ( $F_{2,144}=0.84$ ,  $p=0.44$ ), but  
170 social statuses differed significantly ( $F_{2,144}=7.75$ ,  $p=0.00064$ ). There was no interaction  
171 effect ( $F_{4,144}=0.87$ ,  $p=0.48$ ). *Post hoc* tests showed that alphas ( $p=0.00062$ ) and betas  
172 ( $p=0.014$ ) displaced other fish significantly more than gammas. There were no  
173 differences between alphas and betas ( $p=0.60$ ) (Fig 2b).

174 There was a trend for other members of the social group to approach the focal fish  
175 differentially based on dye color ( $F_{2,144}=2.73$ ,  $p=0.068$ ) but not status ( $F_{2,144}=1.04$ ,  
176  $p=0.35$ ). There was also no interaction ( $F_{4,144}=0.50$ ,  $p=0.74$ ) (Fig 2c). Finally, there were  
177 no differences in rates of submission (i.e., focal fish displaced by others) among dye



178 colors ( $F_{2,144}=1.04$ ,  $p=0.34$ ), but there were significant differences across social status  
179 ( $F_{2,144}=9.04$ ,  $p=0.0002$ ). There was no interaction effect ( $F_{4,144}=0.59$ ,  $p=0.67$ ). *Post hoc*  
180 tests showed that gammas submitted significantly more than alphas ( $p=0.00017$ ) and  
181 betas ( $p=0.0087$ ). There were no differences between alphas and betas ( $p=0.50$ ) (Fig 2d).

182

### 183 ***Dye color affects egg laying***

184 Dye color had a significant effect on the proportion of females that laid eggs  
185 ( $\chi^2=6.80$ ,  $N=153$ ,  $d.f.=2$ ,  $p=0.033$ ). Blue-injected females were significantly less likely to  
186 lay than either green ( $\chi^2=6.04$ ,  $n=102$ ,  $d.f.=1$ ,  $p=0.014$ ) or yellow females ( $\chi^2=6.04$ ,  
187  $n=102$ ,  $d.f.=1$ ,  $p=0.014$ ). There were no differences between green- and yellow-injected  
188 females ( $\chi^2=0$ ,  $n=102$ ,  $d.f.=1$ ,  $p=1.00$ ). Of the females that laid eggs, there was no  
189 significant difference in the number of eggs laid by yellow- (average  $1200.3 \pm 248.3$   
190 eggs) and green-injected (average  $991.7 \pm 216.9$  eggs) females ( $p=0.93$ ) (average undyed  
191 in Solomon-Lane et al., 2015:  $892.5 \pm 62.8$ )

192

### 193 ***Dye color does not affect enzyme immunoassays***

194 We found that the slopes of standard curves spiked with yellow, green, and blue  
195 dye did not differ significantly from the control standard curves for cortisol ( $t_{12}=0.034$ ,  
196  $p=0.97$ ; control:  $y=-1.43\ln(x)+6.65$ ,  $r^2=0.99$ ; dye:  $y=-1.16\ln(x)+5.06$ ,  $r^2=0.99$ ), 11-  
197 ketotestosterone ( $t_{12}=0.30$ ,  $p=0.98$ ; control:  $y=-1.22\ln(x)+1.58$ ,  $r^2=0.99$ ; dye:  $y=-$   
198  $1.10\ln(x)+1.10$ ,  $r^2=0.99$ ), or  $17\beta$ -estradiol ( $t_9=0.31$ ,  $p=0.76$ ; control:  $y=-0.96\ln(x)+3.83$ ,  
199  $r^2=0.98$ ; dye:  $y=-0.94\ln(x)+3.39$ ,  $r^2=0.99$ ).

200

201 **DISCUSSION**

202           In this proof of principle, we demonstrate that food coloring can be used to  
203 effectively mark live *L. dalli* eggs prior to egg laying. This method is simple and  
204 inexpensive, and due to culinary demand, a wide variety of colors are commercially  
205 available as liquid or powder. By counting the number of colored eggs laid inside of a  
206 male *L. dalli*'s nest, we can quantify individual female reproductive success in a social  
207 group with multiple females. The ability to estimate reproductive success for all members  
208 of a group will allow us to directly investigate the evolution of social and reproductive  
209 behavior (e.g., Solomon-Lane et al., 2015), as well as the underlying neuroendocrine  
210 mechanisms (e.g., Pradhan et al., 2014).

211           Our preliminary analyses suggest that green and yellow dyes will be the most  
212 useful for marking *L. dalli* eggs, although additional colors that have yet to be tested may  
213 work equally well. Females injected with green and yellow had high survival, laid eggs,  
214 and interacted socially. Comparisons to a no-dye control injection group will ultimately  
215 be necessary for identifying any specific effects on health, social behavior, male  
216 parenting, as well as egg laying, development, and hatching success. Based on personal  
217 observation, males parent dyed eggs, which go on to develop (Fig 1c) and hatch. Green,  
218 yellow, and blue dyes also had no effect on the standard curves for cortisol, 11-  
219 ketotestosterone, and  $17\beta$ -estradiol, suggesting these dyes can be used in experiments that  
220 quantify hormone concentrations in water, blood, or tissue using enzyme immunoassays.  
221 This method of quantifying neuroendocrine function is very common and can be used to  
222 understand the regulation of behavior and reproduction (e.g., Pradhan et al., 2014).

223           For species like *L. dalli*, in which females lay multiple clutches during the

224 reproductive season, an important limitation of this method is the need to re-inject a  
225 female each time she lays eggs in order for her next clutch to be marked. Females that lay  
226 more frequently will receive more injections, and groups with higher rates of  
227 reproduction will be disturbed more frequently. The potential negative impacts of these  
228 stressors on social and reproductive dynamics remain to be tested, although *L. dalli*  
229 tolerated multiple injections well. There may also be methods for releasing dye over time  
230 in order to avoid repeated injections. One possible solution is implants made by mixing  
231 gelatin powder with food coloring. A small piece of the gelatinous material will release  
232 dye into phosphate buffer for more than 3 weeks, and the mixture can be injected while  
233 warm into anesthetized females so that it gels *in situ* in the abdominal cavity. It may also  
234 be possible to implant a packed pellet of dye powder, similar to pharmacological  
235 manipulations using packed pellets of steroid hormone (e.g., Pradhan et al., 2014). The  
236 efficacy of the gelatin or pellet to dye eggs (a single clutch or multiple clutches) *in vivo*  
237 has yet to be tested.

238         We hope that as a result of this successful demonstration of egg marking in  
239 female *L. dalli* that others explore whether this method is useful in their research. While  
240 our primary goal was to estimate female fitness, we foresee additional applications, for  
241 example, in the study of development. To implement this method, we suggest piloting  
242 multiple colors of dye because both species and experimental context could affect the  
243 efficacy of the dye and/or confounds of specific dye colors. For example, although *L.*  
244 *dalli* females tolerated injections of orange dye well, eggs that were dyed orange could  
245 not be distinguished from the natural orange color of *L. dalli* eggs. Beyond the color of  
246 the egg, the external coloration of the female must also be considered because injecting

247 dye temporarily colors the entire fish. This could affect social or reproductive behavior,  
248 or predation for field studies. Diluting the dye or waiting for the color to fade sufficiently  
249 before (re)placing the focal individual into the experimental context can address this  
250 issue. Interestingly, rose Bengal (red dye no. 105) had a similar effect on mortality in  
251 another goby species (Okuda et al., 2002) as the red dye (no. 40) used in this experiment,  
252 suggesting that red dyes may not be useful, in general, for these purposes.

253 Overall, this simple, inexpensive, and effective method for marking eggs makes it  
254 possible to quantify female reproductive success in polygynous fishes and other external  
255 fertilizers. Estimating fitness in more contexts and species will advance our  
256 understanding of evolution and the mechanisms underlying reproduction, development,  
257 and behavior.

258

259

## 260 **ACKNOWLEDGEMENTS**

261 We thank A. Martinelli, A. Thomas, M. Williams, and L. Rogers for assistance with  
262 behavioral observations, quantifying reproduction, and fish maintenance and care. We  
263 thank the staff at the Wrigley Institute for Environmental Studies for technical support.  
264 This work was supported by grants from National Science Foundation to MSG (IOB-  
265 0548567), and National Science Foundation Doctoral Dissertation Improvement Grant  
266 (1311303), Sigma Xi, Honeycutt Fellowship, and Georgia State University Dissertation  
267 Grant, Brains & Behavior Program, and Neuroscience Institute to TKSL.

268

269 **REFERENCES**

- 270 Archambeault, S., Ng, E., Rapp, L., Cerino, D., Bourque, B., Solomon-Lane, T.K.,  
271 Grober, M.S., Rhyne, A., Crow, K., 2016. Reproduction, larviculture and early  
272 development of the Bluebanded goby, *Lythrypnus dalli*, an emerging model  
273 organism for studies in evolutionary developmental biology and sexual plasticity.  
274 *Aquac. Res.* 47, 1899–1916. <https://doi.org/10.1111/are.12648>
- 275 Buston, P.M., 2004. Does the presence of non-breeders enhance the fitness of breeders?  
276 An experimental analysis in the clown anemonefish *Amphiprion percula*. *Behav.*  
277 *Ecol. Sociobiol.* 57, 23–31. <https://doi.org/10.1007/s00265-004-0833-2>
- 278 Fischer, E.K., Harris, R.M., Hofmann, H.A., Hoke, K.L., 2014. Predator exposure alters  
279 stress physiology in guppies across timescales. *Horm. Behav.* 65, 165–172.  
280 <https://doi.org/10.1016/j.yhbeh.2013.12.010>
- 281 Griffith, S.C., Owens, I.P.F., Thuman, K.A., 2008. Extra pair paternity in birds: a review  
282 of interspecific variation and adaptive function. *Mol. Ecol.* 11, 2195–2212.  
283 <https://doi.org/10.1046/j.1365-294X.2002.01613.x>
- 284 Kidd, C.E., Kidd, M.R., Hofmann, H.A., 2010. Measuring multiple hormones from a  
285 single water sample using enzyme immunoassays. *Gen. Comp. Endocrinol.* 165,  
286 277–285. <https://doi.org/10.1016/j.ygcen.2009.07.008>
- 287 O'Rourke, C.F., Mendelson, T.C., 2014. The fitness consequences of plastic responses to  
288 adult sex ratio in a paternal care fish. *Anim. Behav.* 87, 77–83.  
289 <https://doi.org/10.1016/j.anbehav.2013.10.012>
- 290 Okuda, N., Ito, S., Iwao, H., 2002. A marking technique for live fish eggs and larvae.  
291 *Ichthyol. Res.* 49 (4), 367–370. <https://doi.org/10.1007/s102280200055>
- 292 Olson, V.A., Owens, I.P.F., 1998. Costly sexual signals: are carotenoids rare, risky or  
293 required? *Trends Ecol. Evol.* 13, 510–514. [https://doi.org/10.1016/S0169-5347\(98\)01484-0](https://doi.org/10.1016/S0169-5347(98)01484-0)
- 295 Pradhan, D.S., Solomon-Lane, T.K., Grober, M.S., 2015. Contextual modulation of social  
296 and endocrine correlates of fitness: insights from the life history of a sex changing  
297 fish. *Front. Neurosci.* 9, 1–21. <https://doi.org/10.3389/fnins.2015.00008>
- 298 Pradhan, D.S., Solomon-Lane, T.K., Willis, M.C., Grober, M.S., 2014. A mechanism for  
299 rapid neurosteroidal regulation of parenting behaviour. *Proc. R. Soc. B Biol. Sci.*  
300 281, 20140239–20140239. <https://doi.org/10.1098/rspb.2014.0239>
- 301 Rodgers, E.W., Earley, R.L., Grober, M.S., 2007. Social status determines sexual  
302 phenotype in the bi-directional sex changing bluebanded goby *Lythrypnus dalli*. *J.*  
303 *Fish Biol.* 70, 1660–1668. <https://doi.org/10.1111/j.1095-8649.2007.01427.x>
- 304 Schneider, C.A., Rasband, W.S., Eliceiri, K.W., 2012. NIH Image to ImageJ: 25 years of  
305 Image Analysis HHS Public Access. *Nat. Methods* 9, 671–675.  
306 <https://doi.org/10.1038/nmeth.2089>

- 307 Sih, A., Chang, A.T., Wey, T.W., 2014. Effects of behavioural type, social skill and the  
308 social environment on male mating success in water striders. *Anim. Behav.* 94, 9–  
309 17. <https://doi.org/10.1016/j.anbehav.2014.05.010>
- 310 Silk, J.B., Beehner, J.C., Bergman, T.J., Crockford, C., Engh, A.L., Moscovice, L.R.,  
311 Wittig, R.M., Seyfarth, R.M., Cheney, D.L., 2009. The benefits of social capital:  
312 close social bonds among female baboons enhance offspring survival. *Proc. R. Soc. B Biol. Sci.* 276, 3099–3104. <https://doi.org/10.1098/rspb.2009.0681>
- 314 Solomon-Lane, T.K., Pradhan, D.S., Willis, M.C., Grober, M.S., 2015. Agonistic  
315 reciprocity is associated with reduced male reproductive success within harem  
316 social networks. *Proc. R. Soc. B Biol. Sci.* 282, 20150914.  
317 <https://doi.org/10.1098/rspb.2015.0914>
- 318 Solomon-Lane, T.K., Pradhan, D.S., Willis, M.C., Grober, M.S., 2014. Female, but not  
319 male, agonistic behaviour is associated with male reproductive success in stable  
320 bluebanded goby (*Lythrypnus dalli*) hierarchies. *Behaviour* 151, 1367–1387.  
321 <https://doi.org/10.1163/1568539X-00003188>
- 322 Svensson, O., Kvarnemo, C., 2007. Parasitic spawning in sand gobies: an experimental  
323 assessment of nest-opening size, sneaker male cues, paternity, and filial cannibalism.  
324 *Behav. Ecol.* 18, 410–419. <https://doi.org/10.1093/beheco/arl098>
- 325 Takahashi, D., Ohara, K., 2006. Parentage analyses of freshwater goby *Rhinogobius* sp.  
326 OR using microsatellite DNA markers and egg developmental stages of eggs in the  
327 nest. *Ichthyol. Res.* 53, 87–92. <https://doi.org/10.1007/s10228-005-0309-z>
- 328 Tamada, K., 2008. Estimate of mating pattern of a paternal nest brooder goby of  
329 *Rhinogobius*, using egg density in the nest. *Ichthyol. Res.* 55, 191–197.  
330 <https://doi.org/10.1007/s10228-007-0015-0>
- 331 Tatarenkov, A., Barreto, F., Winkelmann, D.L., Avise, J.C., 2006. Genetic Monogamy in  
332 the Channel Catfish, *Ictalurus Punctatus*, a Species with Uniparental Nest Guarding.  
333 *Copeia* 2006, 735–741. [https://doi.org/10.1643/0045-  
334 8511\(2006\)6\[735:GMITCC\]2.0.CO;2](https://doi.org/10.1643/0045-8511(2006)6[735:GMITCC]2.0.CO;2)
- 335 White, D.J., Gersick, A.S., Freed-Brown, G., Snyder-Mackler, N., 2010. The ontogeny of  
336 social skills: experimental increases in social complexity enhance reproductive  
337 success in adult cowbirds. *Anim. Behav.* 79, 385–390.  
338 <https://doi.org/10.1016/j.anbehav.2009.11.014>
- 339 Zar, J.H., 1999. *Biostatistical Analysis*, 4th ed. Prentice-Hall, Inc.
- 340
- 341

342 **FIGURES**

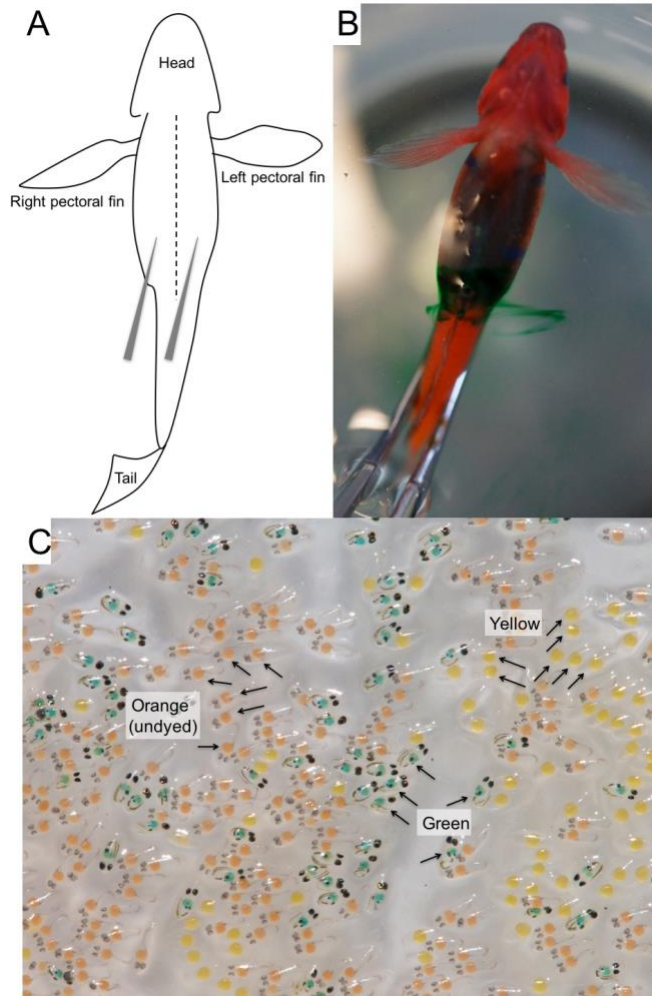

343

344 **Figure 1: Injections of food coloring into the ovary to mark eggs.** **A)** Schematic  
345 drawing (ventral view) of *L. dalli* with injection sites indicated. **B)** Digital image (ventral  
346 view) of an anesthetized gravid female immediately post-injection of green dye. A small  
347 trail of dye is leaving one injection site. **C)** Digital image of multiple egg clutches laid in  
348 the laboratory on a sheet of acetate. The eggs with a yellow yolk were newly laid by a  
349 female injected with yellow dye. The eggs with a green yolk, developed eyes, and a  
350 visible tail were laid by a female injected with green dye. The eggs with an orange yolk  
351 are developmentally intermediate and were laid by an uninjected female.

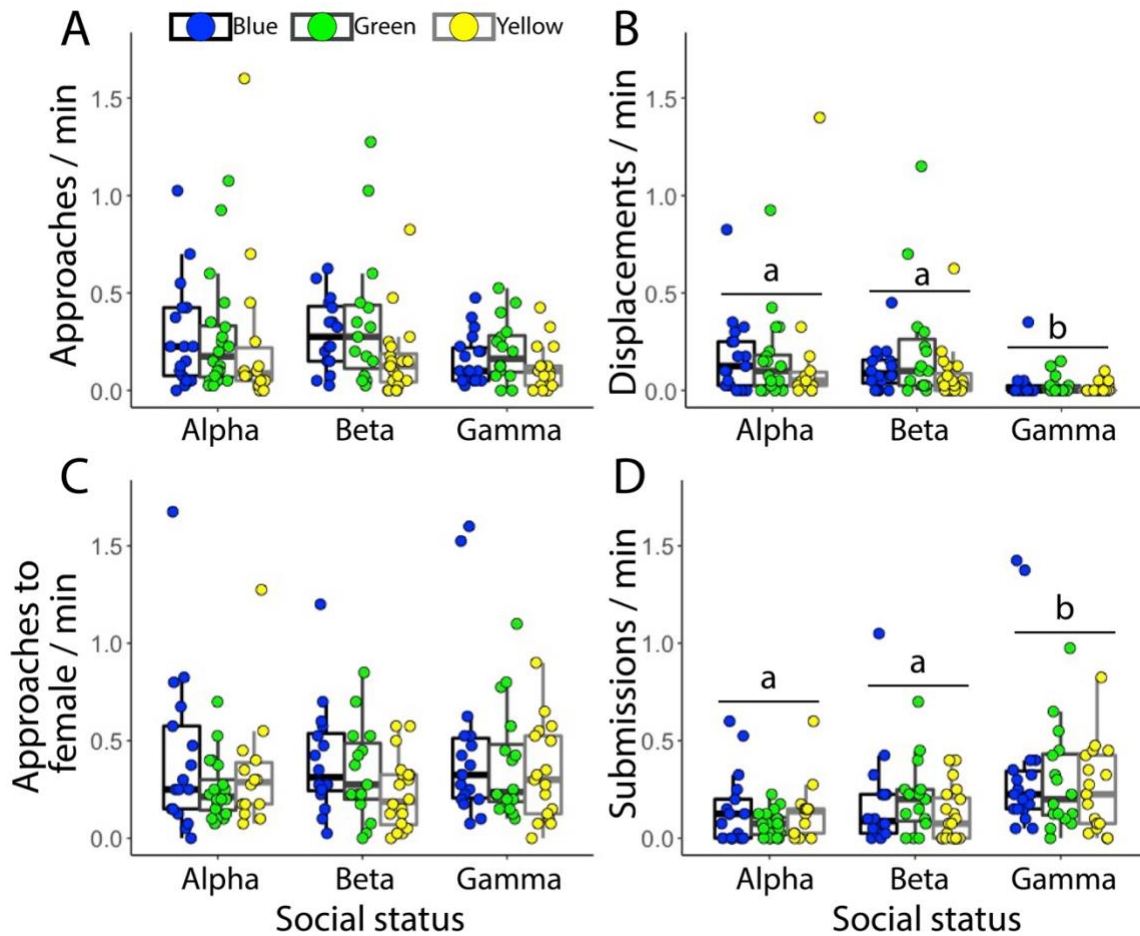

352

353 **Figure 2: Social behavior across dye color and social status.** A) Mean ( $\pm$ SEM)

354 approaches and B) displacements by alpha, beta, and gamma females injected with

355 yellow, green, and blue dye. C) Mean ( $\pm$ SEM) approaches directed to dyed females by

356 other group members. D) Mean ( $\pm$ SEM) submissions by dyed females. Yellow alpha

357 (n=14); yellow beta (n=20); yellow gamma (n=17); green alpha (n=20); green beta

358 (n=15); green gamma (n=16); blue alpha (n=17); blue beta (n=16); blue gamma (n=18).

359 Different letters indicate significant status differences ( $p < 0.05$ ).
